# Supplementary material
Source: publisher figshare collection journal article supplement (https://tandf.figshare.com/ndownloader/files/22173360)
Supplement: Supplementary file 1 [file 22173360]

**Supplementary Table 1.** Food groupings of food items

| Food groups               | Food items                                                                                                                                                                                                             |
|---------------------------|------------------------------------------------------------------------------------------------------------------------------------------------------------------------------------------------------------------------|
| Grains                    | Dark bread (Sangak, Barbari, Taftoon), White bread (Lavash , baguette), toasted bread, , noodles, pasta, rice, cooked barely, bulgur                                                                                   |
| Legumes                   | All kind of legumes including beans, peas, lima beans, lentils, soy                                                                                                                                                    |
| Dairy products            | Milk, yoghurt, cheese (both low and high fat),chocolate milk, doogh (yoghurt drink), cream, kashk, ice cream                                                                                                           |
| Total meats               | Beef, lamb, poultry, fish, organ meat                                                                                                                                                                                  |
| Fruits                    | All fresh fruits, dried fruits                                                                                                                                                                                         |
| Vegetables                | Cruciferous vegetables, tomatoes , carrots, cucumbers, eggplants, corn, garlic, turnips, squash, mushrooms, onions, pumpkin, celery, green peas, green beans, green paper, spinach, lettuce, mixed vegetables, shallot |
| Nuts                      | Peanuts, almonds, walnuts, pistachios, hazelnuts, roasted seeds                                                                                                                                                        |
| Fast foods                | Pizza, processed meats, hamburger, French fries                                                                                                                                                                        |
| Salty snacks              | Potato chips, puffs, crackers                                                                                                                                                                                          |
| Sweets /confectionaries   | Sugar, cube sugar, honey, chocolates, candies and nabat, traditional sweets(gaz, noghle, souhan, halva ), Biscuits, cakes, cookies                                                                                     |
| Oils/fats                 | Vegetable oils, Hydrogenated vegetable fat, animal fats, Butter, margarine                                                                                                                                             |
| Tea /coffee               | Tea, coffee                                                                                                                                                                                                            |
| Fruit juices              | Apple juice, orange juice, other fruit juices                                                                                                                                                                          |
| Sugar-sweetened Beverages | Fruit drinks, carbonated soft drinks                                                                                                                                                                                   |
| Red-meat                  | Beef, lamb                                                                                                                                                                                                             |
| Fish                      | Canned tuna fish , other fish                                                                                                                                                                                          |
| Poultry                   | Chicken                                                                                                                                                                                                                |
| Organ meats               | Organ meats of chicken, lamb and beef                                                                                                                                                                                  |
| Processed meats           | Processed meats                                                                                                                                                                                                        |
| Apples /pears             | Apples and pears                                                                                                                                                                                                       |
| Melons                    | Different kinds of melons                                                                                                                                                                                              |
| Citrus                    | Oranges, grapefruits, mandarins and limes                                                                                                                                                                              |
| Berries                   | Cherry, strawberries, kiwifruit, mulberry, grapes                                                                                                                                                                      |
| Stone fruits              | Nectarines, apricots, peaches and plums                                                                                                                                                                                |
| Potatoes                  | Boiled and fried potato                                                                                                                                                                                                |
| Allium vegetables         | Onions, garlic, shallot                                                                                                                                                                                                |
| Cruciferous vegetables    | Cabbage, cauliflower, Brussels sprouts and broccoli                                                                                                                                                                    |
| Other vegetables          | Tomatoes , carrots, cucumbers, eggplants, corn, turnips, squash, mushrooms, pumpkin, celery, green peas, green beans, green paper                                                                                      |
| Vegetable oils            | Different kind of vegetable oils                                                                                                                                                                                       |
| Vegetable fats            | Hydrogenated vegetable fat and margarine                                                                                                                                                                               |
| Animal fats               | Animal fats and butter                                                                                                                                                                                                 |

**Supplementary Table 2.** Food group intakes of participants according to the baseline body mass index status <sup>a</sup>

| <b>Food groups, g/day</b>        | <b>Normal weight at baseline</b> | <b>Overweight/obese at baseline</b> | <b>p-values <sup>b</sup></b> |
|----------------------------------|----------------------------------|-------------------------------------|------------------------------|
| <b>Grains</b>                    | 393 (289-523)                    | 345 (261-477)                       | 0.001                        |
| <b>Legumes</b>                   | 18.6 (9.0-32.3)                  | 19.5 (9.1-34.1)                     | 0.781                        |
| <b>Dairy products</b>            | 222 (104-315)                    | 229 (100-320)                       | 0.997                        |
| <b>Total Meats</b>               | 23.7 (12.3-38.4)                 | 21.4 (11.7-37.7)                    | 0.258                        |
| <b>Fruits</b>                    | 207 (122-340)                    | 233 (137-387)                       | 0.016                        |
| <b>Vegetables</b>                | 296 (202-420)                    | 320 (226-459)                       | 0.005                        |
| <b>Nuts</b>                      | 6.3 (2.9-12.8)                   | 7.1 (3.4-14.3)                      | 0.058                        |
| <b>Fast foods</b>                | 35.6 (22.5-56.6)                 | 37.5 (23.6-54.4)                    | 0.482                        |
| <b>Salty snacks</b>              | 24.5 (14.6-43.1)                 | 26.5 (16.0-48.0)                    | 0.137                        |
| <b>Sweets/confectionary</b>      | 51.5 (35.0-76.1)                 | 48.2 (30.6-68.3)                    | 0.004                        |
| <b>Oils/ fats</b>                | 131 (72-236)                     | 140 (79-255)                        | 0.032                        |
| <b>Tea/ coffee</b>               | 4.6 (0.6-251.0)                  | 2.1 (0.5-142.0)                     | 0.015                        |
| <b>Fruit juices</b>              | 58.4 (30.7-101.0)                | 74.0 (35.9-131.0)                   | <0.001                       |
| <b>Sugar-sweetened beverages</b> | 31.1 (15.4-60.5)                 | 30.4 (15.0-61.9)                    | 0.835                        |

<sup>a</sup> Data are presented as median (percentile 25-percentile 75).

<sup>b</sup> Estimated using Mann-Whitney U Test.
